# Supplementary material for: Quantitative Proteomic Analysis of Cell Cycle of the Dinoflagellate Prorocentrum donghaiense (Dinophyceae)
Source: PLoS One. 2013 May 15;8(5):e63659. doi: 10.1371/journal.pone.0063659 (PMC3655175; doi:10.1371/journal.pone.0063659)
Supplement: Tables S1 — Includes Table S1 to S5. Table S1. The general information of identified proteins in P. donghaiense cells at different cell cycle phases. Table S2. The information of identified proteins against the NCBI database using MASCOT search. Table S3. The information of identified proteins against the dinoflagellate EST database. Table S4. The information of identified proteins using de novo sequencing and MS-BLAST analysis. Table S5. The unidentified proteins with average relative change at each time point. (XLS) [file pone.0063659.s001.xls]

## Sheet: Table S1
Table S1 The general information of identified proteins in P. donghaiense cells at the different cell cycle phases.
Spot No.	Protein Name	Accession No.	S/G1 ratio	S/G1 p value	E G2/M /G1 ratio	E G2/M /G1 p value	L G2/M /G1 ratio	L G2/M /G1 p value	1-ANOVA	Species	Method of identification
	Cell cycle and division
833	proliferating cell nuclear antigen(PCNA)	gi|190606616	1.69	0.092	2.09	0.069	1.3	0.41	0.049	Prorocentrum donghaiense	Mascot
843	proliferating cell nuclear antigen(PCNA)	gi|190606616	3	0.044	2.91	0.047	1.52	0.4	0.029	Prorocentrum donghaiense	Mascot
	RNA metabolism
501	DEAD/DEAH box helicase domain-containing protein	gi|66825125	1.62	0.075	1.67	0.0086	1.43	0.13	0.045	Dictyostelium discoideum AX4	Mascot
159	tRNA (5-methylaminomethyl-2-thiouridylate)-methyltransferase	gi|312143962	1.55	0.044	1.33	0.13	1.42	0.23	0.14	Halanaerobium sp. 'sapolanicus'	de novo
	Protein metabolism/Chaperone
119	30S ribosomal protein S1	gi|299472226	2.32	0.0037	1.27		2.16	0.088	0.019	Ectocarpus siliculosus	EST
133	30S ribosomal protein S1	gi|299472227	1.59	0.023	1.15		1.48	0.14	0.038	Ectocarpus siliculosus	EST
69	elongation factor 2, putative (EF-2)	gi|294949008	2	0.13			1.85	0.03	0.098	Perkinsus marinus ATCC 50983	Mascot
68	elongation factor 2 (EF-2)	gi|193890971	1.96	0.19			1.78	0.024	0.16	Amphidinium carterae	Mascot
1245	peptidyl-prolyl cis-trans isomerase/cyclophilin, putative （PPIase）	gi|119492760	-1.54	0.027	-1.3	0.18	-1.37	0.36	0.54	Neosartorya fischeri NRRL 181	EST
156	chaperone protein DnaK(DnaK)	gi|254477818	-1.37	0.53			-3.33	0.044	0.12	Ruegeria sp. R11	Mascot
136	heat shock protein 90 (HSP90)	gi|38885083	1.55	0.045	1.32	0.23	1.11	0.58	0.076	Prorocentrum micans	Mascot
132	heat shock protein 90 (HSP90)	gi|54300510	1.56	0.019	1.32	0.37	1.23	0.14	0.18	Kryptoperidinium foliaceum	Mascot
123	heat shock protein, putative (HSP)	gi|294945378	2.01	0.02	1.74	0.012	1.43		0.015	Perkinsus marinus ATCC 50983	Mascot
148	heat shock protein, putative	gi|294945378	1.87	0.041	-1.57	0.12	1.15	0.51	0.034	Perkinsus marinus ATCC 50983	Mascot
874	chaperonin Cpn10/GroES protein	gi|189425978	-2.23	0.033	-1.85	0.032	-1.17	0.29	0.0073	Geobacter lovleyi SZ	de novo
435	ATP-dependent Clp protease proteolytic subunit 3 (clpP3)	gi|227822887	-2.06	0.037	-1.71		-1.7	0.048	0.055	Sinorhizobium fredii NGR234	Mascot
	Oxidation-reduction process
95	2-oxoglutarate ferredoxin oxidoreductase subunit alpha	gi|160903104	-1.24	0.28	-1.38	0.082	-1.8	0.013	0.086	Petrotoga mobilis SJ95	de novo
339	iron-containing alcohol dehydrogenase	gi|146280707	-1.09		-1.53		-1.08		0.035	Pseudomonas stutzeri A1501	de novo
52	isobutyryl-CoA dehydrogenase	gi|260425328	-1.2	0.11	-1.16	0.091	-1.53	0.01	0.019	Citreicella sp. SE45	de novo
46	NAD(P)H-quinone oxidoreductase subunit 4	gi|170078578	-1.79	0.019	-1.95		-1.4	0.043	0.03	Synechococcus sp. PCC 7002	de novo
	Cell structure and motility
312	actin	gi|115386236	-1.22	0.22	-1.65	0.077	-1.32		0.034	Aspergillus terreus NIH2624	Mascot
880	flagellar associated protein	gi|159475433	-1.77	0.016	-1.35	0.19	-1.27	0.045	0.055	Chlamydomonas reinhardtii	EST
	Energy and Carbon metabolish
589	glyceraldehyde-3-phosphate dehydrogenase (GPDH)	gi|35210462	2.13	0.016	1.96	0.027	1.42	0.18	0.0089	Protodinium simplex	Mascot
534	glyceraldehyde-3-phosphate dehydrogenase (GPDH)	gi|4103875	1.84	0.065	1.81	0.051	1.51	0.081	0.041	Gonyaulax polyedra	Mascot
497	glyceraldehyde-3-phosphate dehydrogenase (GPDH)	gi|6979054	1.62	0.0043	1.57		1.33	0.059	0.013	Odontella sinensis	Mascot
533	glyceraldehyde-3-phosphate dehydrogenase (GPDH)	gi|4103875	1.65	0.055	1.66	0.057	1.52	0.067	0.044	Gonyaulax polyedra	Mascot
544	chloroplast sedoheptulose-1,7-bisphosphatase	gi|99903657	1.71	0.035	1.63	0.028	1.61	0.027	0.0091	Lingulodinium polyedrum	Mascot
549	chloroplast sedoheptulose-1,7-bisphosphatase	gi|99903657	1.69	0.029	1.6	0.025	1.46	0.043	0.012	Lingulodinium polyedrum	EST
590	fructose 1,6 bisphosphate aldolase 1	gi|111608860	1.72	0.043	1.6	0.063	-1.18	0.32	0.023	Polytomella parva	Mascot
1032	light-harvesting protein	gi|306430557	-1.53	0.027	-1.31	0.21	-1.42	0.12	0.064	Symbiodinium sp. clade C3	EST
875	chloroplast light harvesting complex protein	gi|58613575	-1.15	0.27	-1.14	0.45	-1.51	0.028	0.09	Heterocapsa triquetra	EST
1116	light-harvesting polyprotein precursor	gi|3355306	-1.19	0.17	-1.46	0.15	-1.58	0.044	0.17	Amphidinium carterae	Mascot
	ABC transporters
1164	excinuclease ABC, A subunit	gi|289638882	-1.67	0.00048	1.38	0.07	-1.53	0.096	0.12	Ethanoligenens harbinense YUAN-3	Mascot
466	branched-chain amino acid ABC transporter, periplasmic substrate-binding protein	gi|56696590	-1.67	0.41			-2.77	0.035	0.31	Ruegeria pomeroyi DSS-3	Mascot
737	outer membrane porin	gi|259417525	3	0.044	2.91	0.047	1.52	0.4	0.029	Silicibacter sp.TrichCH4B	de novo
718	outer membrane porin	gi|259417525	-1.62	0.37	-1.76	0.022	-2.64	0.085	0.35	Silicibacter sp.TrichCH4B	de novo
	Amino acid metabolism
226	methionine S-adenosyl transferase	gi|296784641	1.52	0.055	1.38	0.071	1.26	0.13	0.04	Euglena gracilis	EST
964	adenosylhomocysteinase	gi|211939908	-1.43	0.059	-1.34	0.067	-1.6	0.018	0.049	Amphidinium carterae	EST
82	aspartate/glutamate/uridylate kinase	gi|322369524	1.72	0.04	1.5	0.11	1.65	0.064	0.055	Haladaptatus paucihalophilus DX253	de novo
	Others
873	metal dependent phosphohydrolase	gi|117924737	-1.69	0.01	-1.46		-1.18	0.32	0.066	Magnetococcus sp. MC-1	de novo
48	bifunctional aconitate hydratase 2/2-methylisocitrate dehydratase	gi|172087756	1.57	0.033	1.3	0.027	1.37	0.1	0.053	Vibrio fischeri ES114	Mascot

## Sheet: Table S2
Table S2. The information of identified proteins against the NCBI database using MASCOT search
Spot No.	Protein Name	Accession No.	Species	Protein Score	Protein Score C. I. %	Total Ion Score	Total Ion C. I. %	Pep. Count	Protein MW	Protein PI	Sequence coverage (%)	Peptide
833	proliferating cell nuclear antigen	gi|190606616	Prorocentrum donghaiense	310	100	260	100	9	29199.5	5.02	0.4	VVDAMKDLCK-ESAFSDFK-LMQIESEHMEVPEQHYK-LPSAEFQKICR-DLKEFGETMQLK-EGITFSVQGDMGAGNVMLKPR-YLVNFAK-YNLENADNGHLQFYLAPK
843	proliferating cell nuclear antigen	gi|190606616	Prorocentrum donghaiense	187	100	114	100	8	29192.6	5.02	0.42	CDRPTSLGMNVDSLGK-MCGQNDSLKLR-WQNDADLVSFQCESGEDDR-LMQIESEHMEVPEQHYK-LPSAEFQK-DLKEFGETMQLK-YLVNFAK-YHLENADNGHLQFYLAPK
501	DEAD/DEAH box helicase domain-containing protein	gi|66825125	Dictyostelium discoideum AX4	102	99.924	71	99.468	8	44548.1	6.04	0.25	IVDSFDNMELPKDLLR-GIYSYGFEKPSAIQQR-CQALIIAPTRELAQQIQK-DQIYEIFR-TIQVGLFSATMTDETLGITSK-FMQNPVSILVKK-DELTLEGIR
69	elongation factor 2, putative	gi|294949008	Perkinsus marinus ATCC 50983	99	99.845	51	49.209	11	94089	5.71	0.16	AAGDARFTDTR-ADEQER-FAEMYASKFGVPK-YRVENLYEGPMDDAAANAIR-TVLMMGR-SPNKHNR-LFVTAEPLGDEVSAEIESGK-EHVNSAFQWASKEGPLCEENMR-GCVFEENQKEGTPLLQLK-AQELVLNIRK
68	elongation factor 2	gi|193890971		89	98.373	29	0	7	89742.8	6.07	0.08	FTDTRADEQER-SLTGKALMK-DEYAQCDFIMSDPVVSYR-SPNKHNR-EGPLCEENMR-GAGQIMPPTRR
156	chaperone protein DnaK	gi|254477818	Ruegeria sp. R11	393	100	354	100	7	68856.8	4.55	0.15	VIENAEGAR-QAVTNPDNTVFGVKR-IAGLEVLR-STNGDTFLGGEDFDMR-DAGLSASDVDEVVLVGGMTR-SQVFSTAEDNQNAVTIR-VFQGEREMAADNK
136	heat shock protein 90	gi|38885083	Prorocentrum micans	1050	100	941	100	22	66187.4	5.08	0.34	ELISNASDALDKIR-EDQSEFLEER-KHSEFIGFPIELYVEK-VKEVSHEWEQLNK-NKPLWMR-KSEDVTNEEYASFYK-HFSVEGQLEFR-ALLFVPR-APFDLFESK-GVVDSEDLPLNISRETLQQNK-FYEQFGK-TKVAELMR-SGDEQISLK-EYVDRMK-MKEGQNDIYYITGESIAAVSSSPFLETLR-VETVVVSSR
132	heat shock protein 90	gi|54300510	Kryptoperidinium foliaceum	363	100	218	100	17	65121.1	5.16	0.25	DTELVHGEMKR-IICYLKEDQSEFLEER-NKPLWMR-KSEDVTNEEYASFYK-HFSVEGQLEFR-ALLFVPR-RAPFDLFESK-NNIKLYVR-GVVDSEDLPLNISR-ETLQQNKILR-CLEMFAEIAEK-FYEQFGK-CLKLGVHEDSTNR-TK
123	heat shock protein, putative	gi|294945378	Perkinsus marinus ATCC 50983	155	100	146	100	5	71723.6	4.96	0.08	NGRVEIIPNDQGNR-LLPFSIIDK-IEIEGIMDGIDFSETLSR-ARFEELNADLFK
148	heat shock protein, putative	gi|294945378	Perkinsus marinus ATCC 50983	326	100	311	100	8	71723.6	4.96	0.11	NGRVEIIPNDQGNR-MKETAENYLGTEVK-IINEPTAAAIAYGLDKK-IEIEGIMDGIDFSETLSR-ARFEELNADLFK
435	ATP-dependent Clp protease proteolytic subunit 3	gi|227822887	Sinorhizobium fredii NGR234	85	96.186			11	21897.2	5.5	0.62	MNDDDDQEEK-KTELPLGK-VCSQLVALASASDEDIR-FVKPKVR-TIGTGWVASAGALIFVAPPK-EQRLCLPNTR-FLLHQPSGGTRGMASDIEIQAR-EIIK-DYWLGADEAK-SYGLVSRIVTSVAEI
312	actin	gi|115386236	Aspergillus terreus NIH2624	238	100	146	100	13	40344.2	5.84	0.36	MCKAGFAGDDAPR-AVFPSIVGRPR-DSYVGDEAQSKR-IWHHTFYNELR-VAPEEHPVLLTEAPINPK-GYTFSTTAER-SYELPDGQVITIGNER-MQKEITALAPSSMK-VK-IIAPPERK-QEYDESGPSIVHRK
589	glyceraldehyde-3-phosphate dehydrogenase	gi|35210462	Protodinium simplex	220	100	201	100	5	32853.3	5.62	0.16	IAMKDPETELK-YDGSIEVDGDSLVIDGKK-VIPAVKGK-AGIMLDPTFVK
534	glyceraldehyde-3-phosphate dehydrogenase	gi|4103875	Gonyaulax polyedra	147	100	97	99.999	8	37048.7	5.92	0.2	AALANPDIEVK-YDSVHKR-RFPGTISTK-LTGMAFR-AAKYDDIVAAIK-LVSWYDNEWGYSNR-LVDLAIYMAK
497	glyceraldehyde-3-phosphate dehydrogenase	gi|6979054	Odontella sinensis	156	100	144	100	4	36338	5.59	0.14	MTVSLGINGFGR-KVIISAPSANAPMFVMGVNHK-VISWYDNEWGYSNR
533	glyceraldehyde-3-phosphate dehydrogenase	gi|4103875	Gonyaulax polyedra	249	100	225	100	7	37043.8	5.92	0.19	AALANPDIEVK-YDSVHKR-FPGTISTK-EVDGKEFLVVDGK-VPTPDVSVVDLTCR-LVSWYDNEWGYSNR
590	fructose 1,6 bisphosphate aldolase 1	gi|111608860	Polytomella parva	96	99.675	92	99.995	1	20592.6	8.04	0.07	TPNPWHVSFSYAR
1116	light-harvesting polyprotein precursor	gi|3355306	Amphidinium carterae	91	98.949	60	92.798	6	88135.9	5.93	0.08	QTEIKHGR-LPGYLSPSTGVK-VLTSSNPAEKEK-QTEIKHGR-LSAEIANGR-FPGELSSELK-KLSVDLANGR
1164	excinuclease ABC, A subunit	gi|289638882	Ethanoligenens harbinense YUAN-3	93	99.395	51	31.814	5	105250	6.5	0.05	STVGTVTEIYDYLRLLYAR-IIPDKTR-RLAAELNGAR-CEACQGDGIIK
466	branched-chain amino acid ABC transporter, periplasmic substrate-binding protein	gi|56696590	Ruegeria pomeroyi DSS-3	156	100	140	100	3	48465	4.59	0.09	QLEAVVVDPASDWPLFAEK-FALLGTDYVYPR-TTNNILESYLK
48	bifunctional aconitate hydratase 2/2-methylisocitrate dehydratase	gi|172087756	Vibrio fischeri ES114	119	99.998	96	99.998	7	92187.2	4.74	0.1	AGFLTAVTK-TGGVCLGGK-MTTVGSQDTTGPMTR-MLLPDTVGTGGDSHTR-WMIAEGYGDVR-IETPGCSLCMGNQAR-MGAYTEK
544	chloroplast sedoheptulose-1,7-bisphosphatase	gi|99903657	Lingulodinium polyedrum	139	100	109	100	8	45369.8	5.18	0.18	STGLLGATGR-AAQEVDGYAKLIDHYMTNR-YTLRYSGGLVPDVCQQFTK-LVEMAGGKTSDGVSGQSVLDVK-IEAVDQR

## Sheet: Table S3
		Table S3. The information of identified proteins against the dinoflagellate EST database.
NO.	Protein Name	Accession No.	Species	Max score	Total score	Query coverage	Max ident	Blastx E-value	EST Sequence Number/ Species	Pep. Count	Total Ion Score	Best Ion C. I. %	Total Ion C. I. %
119	30S ribosomal protein S1	gi|299472226	Ectocarpus siliculosus	132	603	0.76	0.57	4e-29	UI-D-GC1-aaf-l-18-0-UI.s1 UI-D-GC1/ Alexandrium tamarense	1	105	100	100
133	30S ribosomal protein S1	gi|299472227	Ectocarpus siliculosus	132	603	0.76	0.57	4e-29	UI-D-GC1-aaf-l-18-0-UI.s1 UI-D-GC1/ Alexandrium tamarense	1	104	100	100
1245	peptidyl-prolyl cis-trans isomerase/cyclophilin, putative	gi|119492760	Neosartorya fischeri NRRL 181	212	212	0.64	0.7	3e-53	UI-D-GC1-aaj-f-12-0-UI.s1 UI-D-GC1/ Alexandrium tamarense	1	94	100	100
880	flagellar associated protein	gi|159475433	Chlamydomonas reinhardtii	130	130	0.89	0.33	2e-28	sq4800cb49/ Alexandrium catenella ACC07	2	89	99.568	100
549	chloroplast sedoheptulose-1,7-bisphosphatase	gi|99903657	Lingulodinium polyedrum	125	125	0.49	0.9	3e-27	UI-D-GC1-aav-j-14-0-UI.s1 UI-D-GC1/ Alexandrium tamarense	1	84	100	100
1032	light-harvesting protein	gi|306430557	Symbiodinium sp. clade C3	239	493	0.99	0.68	1e-61	BP742731/ Lingulodinium polyedrum	1	60	99.919	99.919
875	chloroplast light harvesting complex protein	gi|58613575	Heterocapsa triquetra	215	322	0.99	1	5e-80	HTE00008136/ Heterocapsa triquetra	1	40	93.441	93.441
226	methionine S-adenosyl transferase	gi|296784641	Euglena gracilis	128	155	0.91	0.74	5e-30	K07032G11/ Karenia brevis	1	38	86.154	86.154
964	adenosylhomocysteinase	gi|211939908	Amphidinium carterae	280	280	0.88	0.93	5e-74	BP742934/ Lingulodinium	1	56	99.833	99.833

## Sheet: Table S4
Table S4. The information of identified proteins using de novo sequencing and MS-BLAST analysis
Spot No.	Accession No.	Protein Name	Species	Total HSP	Peptide counts	Pep. Counts of which HSP>62
F6(159)	gi|312143962	tRNA (5-methylaminomethyl-2-thiouridylate)-methyltransferase	Halanaerobium sp. 'sapolanicus'	149	3	1
E15(874)	gi|189425978	chaperonin Cpn10	Geobacter lovleyi SZ	105	2	1
D8(95)	gi|160903104	2-oxoglutarate ferredoxin oxidoreductase subunit alpha	Petrotoga mobilis SJ95	107	2	1
E2(339)	gi|146280707	iron-containing alcohol dehydrogenase	Pseudomonas stutzeri A1501	106	2	1
E16(52)	gi|260425328	isobutyryl-CoA dehydrogenase	Citreicella sp. SE45	109	2	1
E10(46)	gi|170078578	NAD(P)H-quinone oxidoreductase subunit 4	Synechococcus sp. PCC 7002	72	1	1
F7(737)	gi|259417525	outer membrane porin	Silicibacter sp.TrichCH4B	279	4	2
F12(718)	gi|259417525	outer membrane porin	Silicibacter sp.TrichCH4B	350	5	4
E11(873)	gi|117924737	metal dependent phosphohydrolase	Magnetococcus sp. MC-1	74	1	1

## Sheet: Table S5
Table S5. The information of unidentified proteins showing average relative change at each time point.
	1-ANOVA	S/G1 p value	S/G1 ratio	E G2/M /G1 p value	E G2/M /G1 ratio	L G2/M /G1 p value	L G2/M /G1 ratio
1204	0.025	9.4e-05	-1.56	0.026	-1.34	0.12	-1.35
937	0.021	0.02	-1.62	0.029	-1.45	0.3	-1.19
284	0.22	0.36	-1.33			0.043	-1.63
74	0.049	0.092	1.69	0.2	1.68	0.074	1.94
329	0.016	0.08	1.74		1.54	0.0079	1.66
617	0.023	0.012	1.72	0.033	1.63	0.23	1.39
729	0.03		1.73		2.39		1.48
143	0.12	0.04	-1.59	0.0099	-1.91	0.27	-1.33
338		0.012	1.62	0.046	1.21	0.018	1.31
753	0.086	0.13	-1.3	0.023	-1.54	0.23	-1.15
1142	0.083	0.0036	-1.65	0.095	-1.49	0.11	-1.55
681	0.08	0.32	1.22	0.044	1.57	0.12	1.46
